# Supplementary figures and images for: Cell-Culture Adaptation of H3N2 Influenza Virus Impacts Acid Stability and Reduces Airborne Transmission in Ferret Model
Source: MDPI journal article supplement (doi:10.3390/v13050719), 2021-04-21

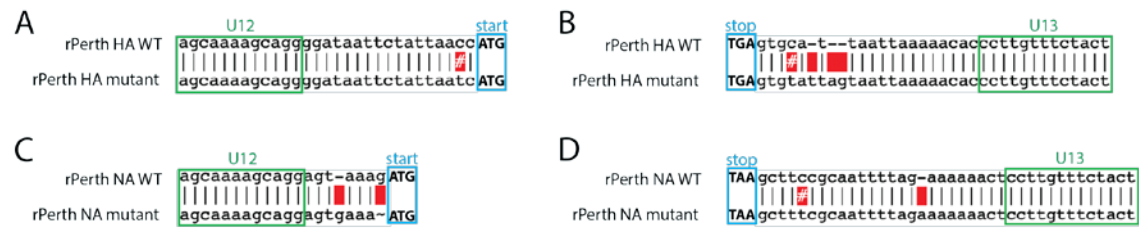

Supplementary File 1

Supplement: s1 [file s1]
